# Supplementary material
Source: PubMed Central journal article supplement (PMC1828484)

1 **Supplementary text**

2  
3 **LEGENDS TO SUPPLEMENTARY FIGURES**

4 **fig. S1. Tyrosine phosphorylation at Y474 of Tir is required for efficient actin**  
5 **polymerization and the recruitment of ZO-1, but not for disruption of the epithelial barrier.**

6 **(A)** Production of actin-rich pedestals by EPEC is dependent on the tyrosine phosphorylation of

7 Tir at Y474. HeLa cells were infected by  $\Delta tir$  containing p99-tir ( $\Delta tir/Tir$ ) or p99-tirY474F.

8 ( $\Delta tir/TirY474F$ ), as described in the Materials and Methods. The cells were fixed and stained

9 for phosphotyrosine with a monoclonal antibody 4G10 (green), for F-actin with

10 rhodamine-phalloidin (red), and for EPEC with anti-intimin antiserum (blue). When the cells

11 were infected with  $\Delta tir/Tir$  expressing a wild-type Tir, anti-phosphotyrosine antibody

12 detected phosphorylated Tir at the interface between the bacteria and pedestals (upper row),

13 whereas no phosphorylation of Tir was detected with  $\Delta tir/TirY474F$  expressing a mutant Tir

14 with a substitution of Y474 by F474 (lower row). Scale bar, 5  $\mu$ m.

15 **(B)** Tyrosine phosphorylation at Y474 is required for ZO-1's recruitment. HeLa cells were

16 infected with a wild-type EPEC (WT),  $\Delta tir$ , or  $\Delta tir/Tir$  or  $\Delta tir/TirY474F$ , as described in the

17 Materials and Methods. The cells were fixed and stained for ZO-1 (green) and F-actin (red),

18 and for bacteria with anti-intimin antiserum (blue). It is notable that no recruitment of ZO-1

19 was observed in the absence of Tir, and even in its presence, the substitution at Y474 of Tir

20 abolished the recruitment. Scale bar, 5  $\mu$ m.

1 (C) EPEC expressing a mutant TirY474F causes a drop of TER, as observed with wild-type  
2 EPEC. The measurement of TER across Caco/B7 monolayers was performed as described  
3 previously (1). Briefly, Caco/B7 monolayers cultured on filter supports (Transwell COL) for  
4 5 days were infected by either wild-type EPEC or the mutants expressing Tir from plasmids  
5 at a MOI of 1 to 3. The TERs across the monolayers were measured with Millicell-ERS  
6 (Millipore) every two hours. Closed square, wild-type EPEC; open square,  $\Delta tir$ ; open  
7 triangle,  $\Delta tir$  expressing a wild-type Tir from p99-tir; open circle,  $\Delta tir$  expressing a mutant  
8 Tir (Y474F) from p99-tirY474F. Data represent the means ( $\pm$  SD) from three independent  
9 experiments.

10  
11 **fig. S2. Recruitment of ZO-1 to the actin tails induced by *S. flexneri* and *L. monocytogenes* is**  
12 **mediated through the proline-rich region of the ZO-1 molecule.**

13 HeLa cells expressing NZO-1 (upper row), control mEGFP (middle row), or  
14 mEGFP-PRR (lower row) were infected by *S. flexneri* (panel A) or *L. monocytogenes* (panel  
15 B) as described in the Materials and Methods. F-actin and bacteria were visualized with  
16 rhodamine-phalloidin (red) and DAPI (blue), respectively. NZO-1 and PRR were detected  
17 with anti-VSVG tag and with the fluorescence of mEGFP, respectively. Scale bars, 5  $\mu$ m.

18  
19 **fig. S3. Clustering of the membrane-targeted Nck SH3 domains induces the recruitment of**  
20 **ZO-1 and formation of actin-tails.**

1 NIH-3T3 cells expressing either Nck SH3(3) (upper row) or Nck SH3(1+2+3) (lower  
2 row) were treated with anti-CD16 and Alexa546-conjugated anti-rat IgG antibodies. After  
3 fixation, the clustered fusion proteins were observed under a fluorescence microscope (CD16,  
4 red). F-actin (panel A) and ZO-1 (panel B) were visualized with Alexa488-phalloidin, and  
5 T8-754 and Alexa488-anti-mouse IgG antibodies, respectively (green). Insets are a higher  
6 magnification of the regions outlined by white dotted lines. Scale bar, 10  $\mu$ m.

## 9 REFERENCE

- 10
- 11 1. **Miyake, M., M. Hanajima, T. Matsuzawa, C. Kobayashi, M. Minami, A. Abe, and Y.**  
12 **Horiguchi.** 2005. Binding of intimin with Tir on the bacterial surface is prerequisite for  
13 the barrier disruption induced by enteropathogenic *Escherichia coli*. *Biochem. Biophys.*  
14 *Res. Commun.* **337**:922-927.

A

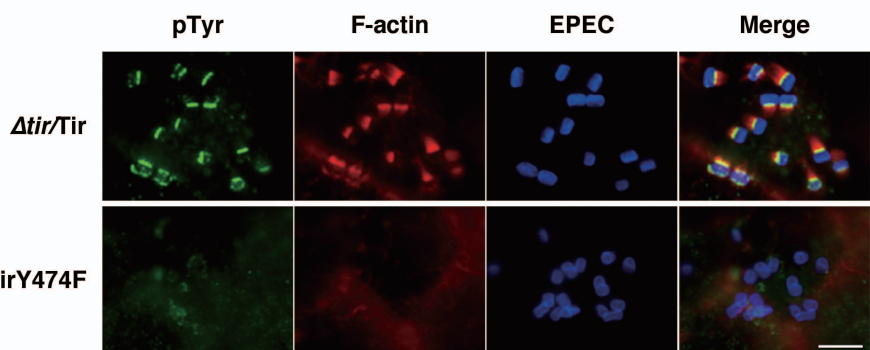

B

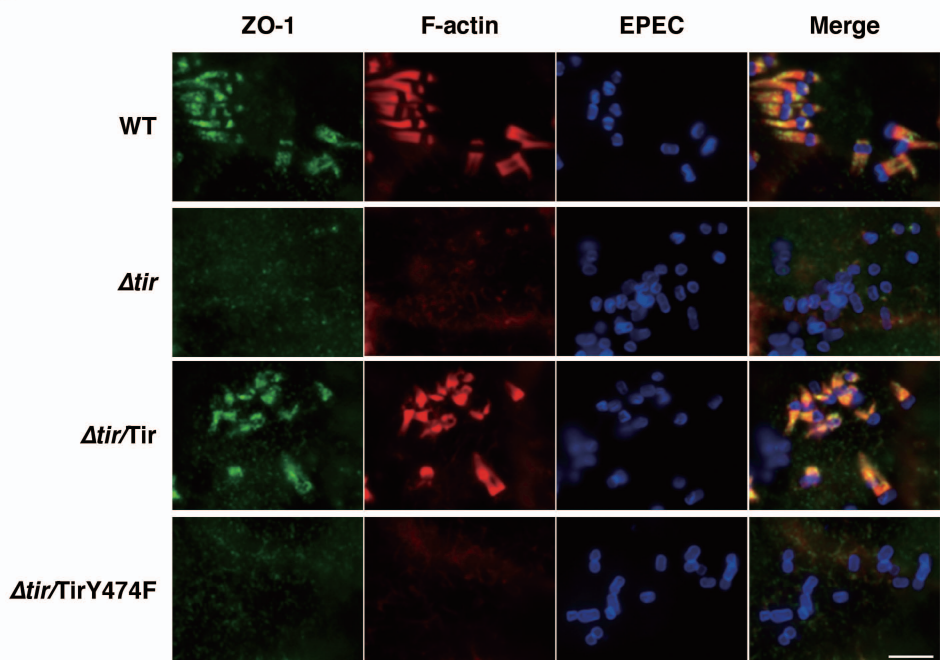

C

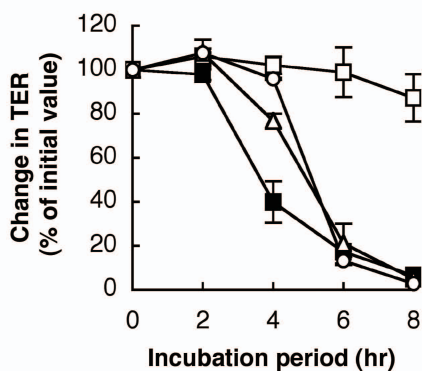

A

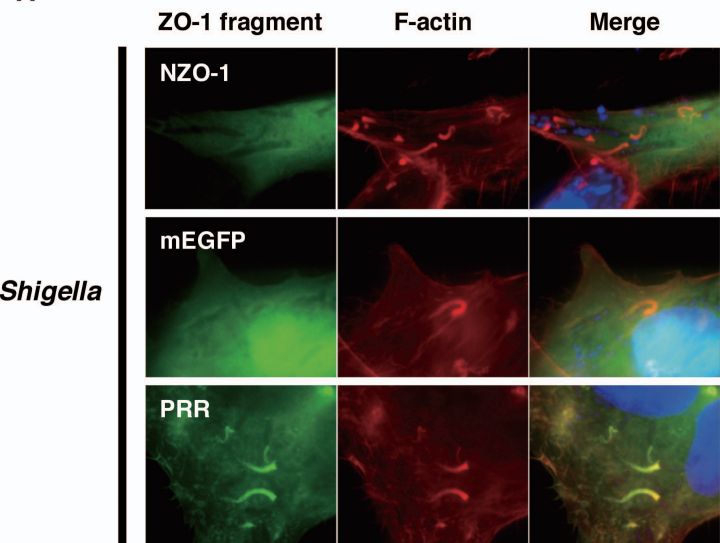

B

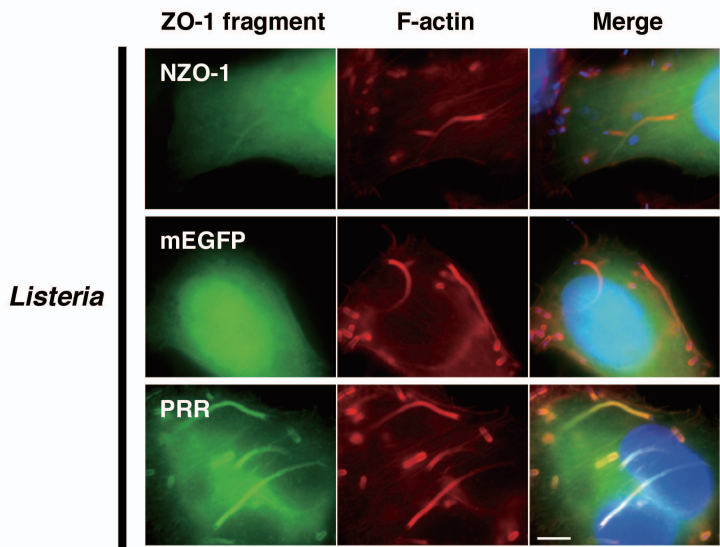

A

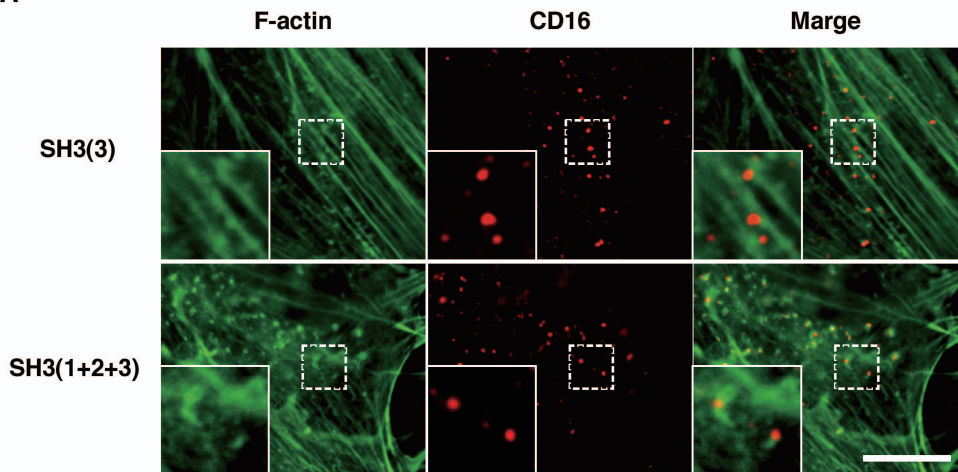

B

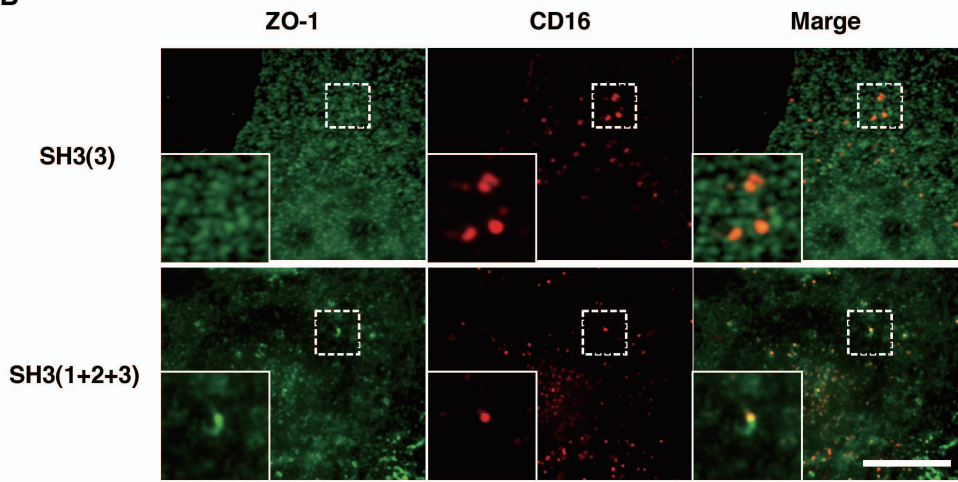

Supplement: iai_75_2_565__1.pdf [file iai_75_2_565__1.pdf]
